# Supplementary material for: Anisotropic mechanical properties of fused deposition modeled parts fabricated by using acrylonitrile butadiene styrene polymer
Source: publisher site journal article supplement (doi:10.1515/polyeng-2016-0263), 2017-01-20
Supplement: Supplementary file 1 [file POLYENG.2016.0263-Supplemental_figure_captions.docx]

**Supplemental material**

**Anisotropic mechanical properties of fused deposition modeled parts fabricated using acrylonitrile butadiene styrene (ABS) polymer**

Maksym Rybachuk, Charlène Alice Mauger, Thomas Fiedler and Andreas Öchsner

DOI 10.1515/polyeng-2016-0263

**Supplemental Figure S1:** Samples before and after tensile testing.

**Supplemental Figure S2:** Samples before and after compression testing.
